# Supplementary material for: Chain Affiliation and Human Resource Investments: Evidence from the Restaurant Industry
Source: Atypon-hosted journal article supplement (doi:10.1287/orsc.2021.1539), 2022-01-14
Supplement: orsc.2021.1539.sm1.pdf [file orsc.2021.1539.sm1.pdf]

## **ONLINE APPENDICES**

**To Article:**

### **CHAIN AFFILIATION AND HUMAN RESOURCE INVESTMENTS: EVIDENCE FROM THE RESTAURANT INDUSTRY**

#### **Contents:**

- Appendix 1: Characteristics of Sample Restaurants
- Appendix 2: Comparison Between the Sample and the Population
- Appendix 3: OLS Regressions Predicting the Effect of Single-Unit vs. Multi-Unit Ownership on HR Practices
- Appendix 4: OLS Regressions Predicting the Effect of Franchisor Influence on HR Practices
- Appendix 5: OLS Regressions Predicting Organizational Outcomes

**APPENDIX 1:**

**CHARACTERISTICS OF SAMPLE RESTAURANTS**

|                                              | Percent of repeat customers | Average spending/customer | Total number of employees | Number of seats | Age of the restaurant (years) | Tenure of manager/owner | Industry experience of manger/owner |
|----------------------------------------------|-----------------------------|---------------------------|---------------------------|-----------------|-------------------------------|-------------------------|-------------------------------------|
| Company-owned restaurants <sup>a</sup>       | 61.58                       | 27.16                     | 41                        | 159.84          | 19.13                         | 5.65                    | 16.15                               |
| Franchisee-owned restaurants <sup>b</sup>    | 63.08                       | 13.42                     | 28                        | 107.24          | 15.76                         | 5.71                    | 14.57                               |
| Independently owned restaurants <sup>c</sup> | 67.91                       | 32.63                     | 27                        | 133.54          | 20.36                         | 10.48                   | 20.58                               |

<sup>a</sup>N=193, <sup>b</sup>N=196, <sup>c</sup>N=665

Table 1 (Continued)

|                                              | Upscale fine dining | Casual fine dining | Moderately priced | Fast food | Employee age | Employee education | Employee tenure |
|----------------------------------------------|---------------------|--------------------|-------------------|-----------|--------------|--------------------|-----------------|
| Company-owned restaurants <sup>a</sup>       | 17.62%              | 19.69%             | 43.52%            | 19.17%    | 27.53        | 12.30              | 53.07           |
| Franchisee-owned restaurants <sup>b</sup>    | 2.04%               | 5.61%              | 43.37%            | 48.98%    | 25.17        | 12.08              | 40.83           |
| Independently owned restaurants <sup>c</sup> | 19.70%              | 31.58%             | 39.25%            | 9.47%     | 29.95        | 12.63              | 60.33           |

<sup>a</sup>N=193, <sup>b</sup>N=196, <sup>c</sup>N=665

**APPENDIX 2:**

**COMPARISON BETWEEN THE SAMPLE AND THE POPULATION**

To assess the representativeness of our sample, we compared the characteristics of the sample to the overall population, which were obtained from the U.S. Census. These characteristics include percentage of a specific type of restaurant, annual sales per restaurant, average annual wage for employees, and total number of employees per restaurant.

**Table 2A  
Comparison between the Sample and the Population**

|                                 | Percentage | Annual sales per restaurant | Average annual wage for employees | Number of employees per restaurant |
|---------------------------------|------------|-----------------------------|-----------------------------------|------------------------------------|
| <i>Sample (N = 1,054)</i>       |            |                             |                                   |                                    |
| All restaurants                 |            | \$2,154,416                 | \$13,746                          | 30                                 |
| Company-owned restaurants       | 0.18       | \$2,982,685                 | \$13,379                          | 41                                 |
| Franchisee-owned restaurants    | 0.19       | \$1,757,931                 | \$11,702                          | 28                                 |
| Independently owned restaurants | 0.63       | \$2,030,890                 | \$14,455                          | 27                                 |
| <i>Population<sup>a</sup></i>   |            |                             |                                   |                                    |
| All restaurants                 |            | \$897,073                   | \$14,288                          | 18                                 |
| Company-owned restaurants       | 0.06       | \$1,255,893                 | \$13,533                          | 25                                 |
| Franchisee-owned restaurants    | 0.28       | \$1,062,706                 | \$12,159                          | 22                                 |
| Independently owned restaurants | 0.67       | \$799,365                   | \$15,648                          | 16                                 |

<sup>a</sup>Source: EC1200CFRA1: Economic Census: Core Business Statistics Series, 2012: Franchise Status for Selected Industries and States: 2012

### **APPENDIX 3:**

#### **OLS REGRESSIONS PREDICTING THE EFFECT OF SINGLE-UNIT VS. MULTI-UNIT OWNERSHIP ON HR PRACTICES**

To examine the effect of single-unit and multi-unit ownership on the adoption of HR practices, we separate independently owned and franchisee-owned establishments into two subcategories: single-unit and multi-unit independents, and single-unit and multi-unit franchisees. We created a dichotomous variable for each of the four subcategories. An establishment is defined as single unit when its owner (franchisee or independent) owns only one restaurant and is defined as multi-unit when its owner owns more than one restaurant. All company-owned restaurants in this study are multi-unit because their direct owner (i.e., the brand) owns multiple establishments. To make comparisons between two categories, we designated one of the five dichotomous variables as the baseline in each of our analytical models. The results are shown in Table 3A.

**Table 3A**  
**OLS Regressions Predicting the Effect of Single-Unit vs. Multi-Unit Ownership on HR Practices**

| Variable                                   | Skill-enhancing HR practices |                  |                    |                   |                    | Motivation-enhancing HR practices |                   |                   |                   |                   |
|--------------------------------------------|------------------------------|------------------|--------------------|-------------------|--------------------|-----------------------------------|-------------------|-------------------|-------------------|-------------------|
|                                            | Model 1                      | Model 2          | Model 3            | Model 4           | Model 5            | Model 6                           | Model 7           | Model 8           | Model 9           | Model 10          |
| <i>Single-unit franchisee<sup>a</sup></i>  |                              |                  | -0.12<br>(0.12)    | 0.19+<br>(0.11)   | -0.02<br>(0.12)    |                                   |                   | -0.19*<br>(0.09)  | -0.21**<br>(0.08) | -0.25**<br>(0.08) |
| <i>Multi-unit franchisee<sup>b</sup></i>   |                              | 0.12<br>(0.12)   |                    | 0.31***<br>(0.08) | 0.09<br>(0.09)     |                                   | 0.19*<br>(0.09)   |                   | -0.03<br>(0.05)   | -0.07<br>(0.06)   |
| <i>Single-unit independent<sup>c</sup></i> |                              | -0.19+<br>(0.11) | -0.31***<br>(0.08) |                   | -0.21***<br>(0.06) |                                   | 0.21**<br>(0.08)  | 0.03<br>(0.05)    |                   | -0.04<br>(0.04)   |
| <i>Multi-unit independent<sup>d</sup></i>  |                              | 0.02<br>(0.12)   | -0.09<br>(0.09)    | 0.21***<br>(0.06) |                    |                                   | 0.25**<br>(0.08)  | 0.07<br>(0.06)    | 0.04<br>(0.04)    |                   |
| <i>Company-owned</i>                       |                              | 0.36**<br>(0.12) | 0.25**<br>(0.08)   | 0.55***<br>(0.07) | 0.34***<br>(0.08)  |                                   | 0.32***<br>(0.09) | 0.14*<br>(0.06)   | 0.11*<br>(0.05)   | 0.07<br>(0.05)    |
| <i>Upscale fine dining</i>                 | -0.06<br>(0.10)              | 0.03<br>(0.10)   | 0.03<br>(0.10)     | 0.03<br>(0.10)    | 0.03<br>(0.10)     | 0.08<br>(0.07)                    | 0.07<br>(0.07)    | 0.07<br>(0.07)    | 0.07<br>(0.07)    | 0.07<br>(0.07)    |
| <i>Casual fine dining</i>                  | -0.17+<br>(0.09)             | -0.08<br>(0.09)  | -0.08<br>(0.09)    | -0.08<br>(0.09)   | -0.08<br>(0.09)    | 0.06<br>(0.06)                    | 0.05<br>(0.06)    | 0.05<br>(0.06)    | 0.05<br>(0.06)    | 0.05<br>(0.06)    |
| <i>Moderately priced family</i>            | -0.13<br>(0.08)              | -0.10<br>(0.08)  | -0.10<br>(0.08)    | -0.10<br>(0.08)   | -0.10<br>(0.08)    | -0.03<br>(0.06)                   | -0.03<br>(0.06)   | -0.03<br>(0.06)   | -0.03<br>(0.06)   | -0.03<br>(0.06)   |
| <i>Establishment size (log)</i>            | 0.12***<br>(0.03)            | 0.09**<br>(0.03) | 0.09**<br>(0.03)   | 0.09**<br>(0.03)  | 0.09**<br>(0.03)   | -0.01<br>(0.02)                   | -0.02<br>(0.02)   | -0.02<br>(0.02)   | -0.02<br>(0.02)   | -0.02<br>(0.02)   |
| <i>Establishment age (log)</i>             | -0.05*<br>(0.02)             | -0.03<br>(0.02)  | -0.03<br>(0.02)    | -0.03<br>(0.02)   | -0.03<br>(0.02)    | 0.05**<br>(0.02)                  | 0.05**<br>(0.02)  | 0.05**<br>(0.02)  | 0.05**<br>(0.02)  | 0.05**<br>(0.02)  |
| <i>Firm revenue (log)</i>                  | 0.03<br>(0.03)               | 0.01<br>(0.03)   | 0.01<br>(0.03)     | 0.01<br>(0.03)    | 0.01<br>(0.03)     | 0.07***<br>(0.02)                 | 0.07***<br>(0.02) | 0.07***<br>(0.02) | 0.07***<br>(0.02) | 0.07***<br>(0.02) |
| <i>QSR 50 brand</i>                        | 0.26**<br>(0.08)             | 0.12<br>(0.09)   | 0.12<br>(0.09)     | 0.12<br>(0.09)    | 0.12<br>(0.09)     | -0.09<br>(0.07)                   | -0.07<br>(0.07)   | -0.07<br>(0.07)   | -0.07<br>(0.07)   | -0.07<br>(0.07)   |
| <i>Percent of repeat customers</i>         | -0.13<br>(0.13)              | -0.03<br>(0.12)  | -0.03<br>(0.12)    | -0.03<br>(0.12)   | -0.03<br>(0.12)    | 0.14+<br>(0.08)                   | 0.16+<br>(0.08)   | 0.16+<br>(0.08)   | 0.16+<br>(0.08)   | 0.16+<br>(0.08)   |
| <i>Employee education level</i>            | 0.02<br>(0.03)               | 0.03<br>(0.03)   | 0.03<br>(0.03)     | 0.03<br>(0.03)    | 0.03<br>(0.03)     | 0.01<br>(0.02)                    | 0.01<br>(0.02)    | 0.01<br>(0.02)    | 0.01<br>(0.02)    | 0.01<br>(0.02)    |
| State dummy variables                      | Yes                          | Yes              | Yes                | Yes               | Yes                | Yes                               | Yes               | Yes               | Yes               | Yes               |
| <i>R</i> <sup>2</sup>                      | 0.074                        | 0.138            | 0.138              | 0.138             | 0.138              | 0.114                             | 0.128             | 0.128             | 0.128             | 0.128             |

**Notes:** The values in parentheses are the standard errors. N=1051, <sup>a</sup>N=38, <sup>b</sup>N=156, <sup>c</sup>N=435, <sup>d</sup>N=229; +p<.10, \*p<.05, \*\*p<.01, \*\*\*p<.001

**Table 3A (Continued)**

| Variable                                   | Opportunity-enhancing HR practices |                  |                  |                   |                  |
|--------------------------------------------|------------------------------------|------------------|------------------|-------------------|------------------|
|                                            | Model 11                           | Model 12         | Model 13         | Model 14          | Model 15         |
| <i>Single-unit franchisee<sup>a</sup></i>  |                                    |                  | -0.03<br>(0.18)  | -0.35*<br>(0.17)  | -0.18<br>(0.17)  |
| <i>Multi-unit franchisee<sup>b</sup></i>   |                                    | 0.03<br>(0.18)   |                  | -0.32**<br>(0.12) | -0.16<br>(0.13)  |
| <i>Single-unit independent<sup>c</sup></i> |                                    | 0.35*<br>(0.17)  | 0.32**<br>(0.12) |                   | 0.17*<br>(0.08)  |
| <i>Multi-unit independent<sup>d</sup></i>  |                                    | 0.18<br>(0.17)   | 0.16<br>(0.13)   | -0.17*<br>(0.08)  |                  |
| <i>Company-owned</i>                       |                                    | 0.10<br>(0.18)   | 0.08<br>(0.12)   | -0.25**<br>(0.09) | -0.08<br>(0.10)  |
| <i>Upscale fine dining</i>                 | -0.005<br>(0.14)                   | -0.10<br>(0.14)  | -0.10<br>(0.14)  | -0.10<br>(0.14)   | -0.10<br>(0.14)  |
| <i>Casual fine dining</i>                  | 0.005<br>(0.13)                    | -0.08<br>(0.13)  | -0.08<br>(0.13)  | -0.08<br>(0.13)   | -0.08<br>(0.13)  |
| <i>Moderately priced family</i>            | -0.05<br>(0.12)                    | -0.08<br>(0.12)  | -0.08<br>(0.12)  | -0.08<br>(0.12)   | -0.08<br>(0.12)  |
| <i>Establishment size (log)</i>            | -0.15*<br>(0.06)                   | -0.14*<br>(0.06) | -0.14*<br>(0.06) | -0.14*<br>(0.06)  | -0.14*<br>(0.06) |
| <i>Establishment age (log)</i>             | 0.01<br>(0.04)                     | -0.01<br>(0.04)  | -0.01<br>(0.04)  | -0.01<br>(0.04)   | -0.01<br>(0.04)  |
| <i>Firm revenue (log)</i>                  | -0.09*<br>(0.04)                   | -0.07+<br>(0.04) | -0.07+<br>(0.04) | -0.07+<br>(0.04)  | -0.07+<br>(0.04) |
| <i>QSR 50 brand</i>                        | -0.34*<br>(0.13)                   | -0.20<br>(0.15)  | -0.20<br>(0.15)  | -0.20<br>(0.15)   | -0.20<br>(0.15)  |
| <i>Percent of repeat customers</i>         | 0.22<br>(0.16)                     | 0.17<br>(0.16)   | 0.17<br>(0.16)   | 0.17<br>(0.16)    | 0.17<br>(0.16)   |
| <i>Employee education level</i>            | 0.06*<br>(0.03)                    | 0.06+<br>(0.03)  | 0.06+<br>(0.03)  | 0.06+<br>(0.03)   | 0.06+<br>(0.03)  |
| State dummy variables                      | Yes                                | Yes              | Yes              | Yes               | Yes              |
| <i>R</i> <sup>2</sup>                      | 0.063                              | 0.075            | 0.075            | 0.075             | 0.075            |

**Notes:** The values in parentheses are the standard errors. N=1051, <sup>a</sup>N=38, <sup>b</sup>N=156, <sup>c</sup>N=435, <sup>d</sup>N=229; +p<.10, \*p<.05, \*\*p<.01, \*\*\*p<.001

**APPENDIX 4:**  
**OLS REGRESSIONS PREDICTING THE EFFECT OF FRANCHISOR INFLUENCE ON**  
**HR PRACTICES**

We measured franchisor influence by asking respondents in franchisee-owned units whether corporate has influence over the following six HR decisions: staffing, training, compensation, performance management, employee relations, and total labor costs. Respondents reported a value of 1 if corporate has influence in a specific area, and a value of 0 otherwise. We aggregated the six items to create an overall measure of franchisor influence, ranging from a minimum of 0 to a maximum of 6. The median value of franchisor influence is 2, which separates franchisee-owned units into two subgroups: high influence franchisees and low influence franchisees. We then performed regression analyses to examine whether the adoption of HR practices differs across four groups: high influence franchisees, low influence franchisees, independently owned units, and company-owned units. The results are presented in Table 4A.

**Table 4A**  
**OLS Regressions Predicting the Effect of Franchisor Influence on HR Practices**

| Variable                                     | Skill-enhancing HR practices |                  |                  |                   |                    | Motivation-enhancing HR practices |                   |                   |                   |                    |
|----------------------------------------------|------------------------------|------------------|------------------|-------------------|--------------------|-----------------------------------|-------------------|-------------------|-------------------|--------------------|
|                                              | Model 1                      | Model 2          | Model 3          | Model 4           | Model 5            | Model 6                           | Model 7           | Model 8           | Model 9           | Model 10           |
| <i>High influence franchisee<sup>a</sup></i> |                              |                  | -0.01<br>(0.10)  | 0.18*<br>(0.08)   | -0.28**<br>(0.09)  |                                   |                   | 0.14*<br>(0.07)   | -0.02<br>(0.06)   | -0.11+<br>(0.06)   |
| <i>Low influence franchisee<sup>b</sup></i>  |                              | 0.01<br>(0.10)   |                  | 0.19*<br>(0.09)   | -0.28**<br>(0.10)  |                                   | -0.14*<br>(0.07)  |                   | -0.16**<br>(0.05) | -0.25***<br>(0.06) |
| <i>Independently owned<sup>c</sup></i>       |                              | -0.18*<br>(0.08) | -0.19*<br>(0.09) |                   | -0.46***<br>(0.07) |                                   | 0.02<br>(0.06)    | 0.16**<br>(0.05)  |                   | -0.09*<br>(0.05)   |
| <i>Company-owned<sup>d</sup></i>             |                              | 0.28**<br>(0.09) | 0.28**<br>(0.10) | 0.46***<br>(0.07) |                    |                                   | 0.11+<br>(0.06)   | 0.25***<br>(0.06) | 0.09*<br>(0.05)   |                    |
| <i>Upscale fine dining</i>                   | -0.07<br>(0.10)              | -0.01<br>(0.11)  | -0.01<br>(0.11)  | -0.01<br>(0.11)   | -0.01<br>(0.11)    | 0.07<br>(0.07)                    | 0.05<br>(0.07)    | 0.05<br>(0.07)    | 0.05<br>(0.07)    | 0.05<br>(0.07)     |
| <i>Casual fine dining</i>                    | -0.17+<br>(0.09)             | -0.10<br>(0.10)  | -0.10<br>(0.10)  | -0.10<br>(0.10)   | -0.10<br>(0.10)    | 0.06<br>(0.06)                    | 0.04<br>(0.06)    | 0.04<br>(0.06)    | 0.04<br>(0.06)    | 0.04<br>(0.06)     |
| <i>Moderately priced family</i>              | -0.14<br>(0.08)              | -0.12<br>(0.08)  | -0.12<br>(0.08)  | -0.12<br>(0.08)   | -0.12<br>(0.08)    | -0.04<br>(0.06)                   | -0.04<br>(0.06)   | -0.04<br>(0.06)   | -0.04<br>(0.06)   | -0.04<br>(0.06)    |
| <i>Establishment size (log)</i>              | 0.12***<br>(0.03)            | 0.10**<br>(0.03) | 0.10**<br>(0.03) | 0.10**<br>(0.03)  | 0.10**<br>(0.03)   | -0.01<br>(0.02)                   | -0.02<br>(0.02)   | -0.02<br>(0.02)   | -0.02<br>(0.02)   | -0.02<br>(0.02)    |
| <i>Establishment age (log)</i>               | -0.05+<br>(0.02)             | -0.04+<br>(0.02) | -0.04+<br>(0.02) | -0.04+<br>(0.02)  | -0.04+<br>(0.02)   | 0.05**<br>(0.02)                  | 0.05**<br>(0.02)  | 0.05**<br>(0.02)  | 0.05**<br>(0.02)  | 0.05**<br>(0.02)   |
| <i>Firm revenue (log)</i>                    | 0.03<br>(0.03)               | 0.01<br>(0.03)   | 0.01<br>(0.03)   | 0.01<br>(0.03)    | 0.01<br>(0.03)     | 0.07***<br>(0.02)                 | 0.07***<br>(0.02) | 0.07***<br>(0.02) | 0.07***<br>(0.02) | 0.07***<br>(0.02)  |
| <i>QSR 50 brand</i>                          | 0.26***<br>(0.08)            | 0.15+<br>(0.08)  | 0.15+<br>(0.08)  | 0.15+<br>(0.08)   | 0.15+<br>(0.08)    | -0.11<br>(0.07)                   | -0.07<br>(0.07)   | -0.07<br>(0.07)   | -0.07<br>(0.07)   | -0.07<br>(0.07)    |
| <i>Percent of repeat customers</i>           | -0.13<br>(0.13)              | -0.04<br>(0.12)  | -0.04<br>(0.12)  | -0.04<br>(0.12)   | -0.04<br>(0.12)    | 0.13<br>(0.08)                    | 0.13+<br>(0.08)   | 0.13+<br>(0.08)   | 0.13+<br>(0.08)   | 0.13+<br>(0.08)    |
| <i>Employee education level</i>              | 0.02<br>(0.03)               | 0.04<br>(0.03)   | 0.04<br>(0.03)   | 0.04<br>(0.03)    | 0.04<br>(0.03)     | 0.01<br>(0.02)                    | 0.01<br>(0.02)    | 0.01<br>(0.02)    | 0.01<br>(0.02)    | 0.01<br>(0.02)     |
| State dummy variables                        | Yes                          | Yes              | Yes              | Yes               | Yes                | Yes                               | Yes               | Yes               | Yes               | Yes                |
| <i>R</i> <sup>2</sup>                        | 0.075                        | 0.126            | 0.126            | 0.126             | 0.126              | 0.119                             | 0.132             | 0.132             | 0.132             | 0.132              |

**Notes:** The values in parentheses are the standard errors. N=1051, <sup>a</sup>N=87, <sup>b</sup>N=106, <sup>c</sup>N=665, <sup>d</sup>N=193; +p<.10, \*p<.05, \*\*p<.01, \*\*\*p<.001

**Table 4A (Continued)**

| Variable                                     | Opportunity-enhancing HR practices |                   |                   |                    |                   |
|----------------------------------------------|------------------------------------|-------------------|-------------------|--------------------|-------------------|
|                                              | Model 11                           | Model 12          | Model 13          | Model 14           | Model 15          |
| <i>High influence franchisee<sup>a</sup></i> |                                    |                   | 0.47**<br>(0.18)  | -0.01<br>(0.16)    | 0.17<br>(0.16)    |
| <i>Low influence franchisee<sup>b</sup></i>  |                                    | -0.47**<br>(0.18) |                   | -0.48***<br>(0.11) | -0.30*<br>(0.12)  |
| <i>Independently owned<sup>c</sup></i>       |                                    | 0.01<br>(0.16)    | 0.48***<br>(0.11) |                    | 0.18*<br>(0.09)   |
| <i>Company-owned<sup>d</sup></i>             |                                    | -0.17<br>(0.16)   | 0.30*<br>(0.12)   | -0.18*<br>(0.09)   |                   |
| <i>Upscale fine dining</i>                   | -0.003<br>(0.14)                   | -0.07<br>(0.14)   | -0.07<br>(0.14)   | -0.07<br>(0.14)    | -0.07<br>(0.14)   |
| <i>Casual fine dining</i>                    | 0.01<br>(0.13)                     | -0.06<br>(0.13)   | -0.06<br>(0.13)   | -0.06<br>(0.13)    | -0.06<br>(0.13)   |
| <i>Moderately priced family</i>              | -0.05<br>(0.12)                    | -0.07<br>(0.12)   | -0.07<br>(0.12)   | -0.07<br>(0.12)    | -0.07<br>(0.12)   |
| <i>Establishment size (log)</i>              | -0.15*<br>(0.06)                   | -0.16**<br>(0.06) | -0.16**<br>(0.06) | -0.16**<br>(0.06)  | -0.16**<br>(0.06) |
| <i>Establishment age (log)</i>               | 0.01<br>(0.04)                     | 0.01<br>(0.03)    | 0.01<br>(0.03)    | 0.01<br>(0.03)     | 0.01<br>(0.03)    |
| <i>Firm revenue (log)</i>                    | -0.09*<br>(0.04)                   | -0.08*<br>(0.04)  | -0.08*<br>(0.04)  | -0.08*<br>(0.04)   | -0.08*<br>(0.04)  |
| <i>QSR 50 brand</i>                          | -0.35**<br>(0.14)                  | -0.26+<br>(0.15)  | -0.26+<br>(0.15)  | -0.26+<br>(0.15)   | -0.26+<br>(0.15)  |
| <i>Percent of repeat customers</i>           | 0.21<br>(0.16)                     | 0.15<br>(0.16)    | 0.15<br>(0.16)    | 0.15<br>(0.16)     | 0.15<br>(0.16)    |
| <i>Employee education level</i>              | 0.06*<br>(0.03)                    | 0.05+<br>(0.03)   | 0.05+<br>(0.03)   | 0.05+<br>(0.03)    | 0.05+<br>(0.03)   |
| State dummy variables                        | Yes                                | Yes               | Yes               | Yes                | Yes               |
| <i>R</i> <sup>2</sup>                        | 0.064                              | 0.082             | 0.082             | 0.082              | 0.082             |

**Notes:** The values in parentheses are the standard errors. N=1051, <sup>a</sup>N=87, <sup>b</sup>N=106, <sup>c</sup>N=665, <sup>d</sup>N=193; +p<.10, \*p<.05, \*\*p<.01, \*\*\*p<.001

## **APPENDIX 5:**

### **OLS REGRESSIONS PREDICTING ORGANIZATIONAL OUTCOMES**

We measured employee turnover by examining voluntary turnover, involuntary turnover, and total turnover. Voluntary turnover is the percentage of employees who quit in the past year. Involuntary turnover is the percentage of employees who were dismissed for cause in the past year. Total turnover is the percentage of employees who either voluntarily quit or were dismissed in the past year (Batt and Colvin 2011). To reduce skewness, we used the natural logarithms of the three turnover variables. Customer satisfaction is the mean Yelp rating for each restaurant, which ranges from 1 (one star, the lowest rating possible) to 5 (five stars, the highest rating possible). The application of online customer reviews has been increasingly common in studies that focus on the service industry (e.g. Lawrence and Perrigot 2015). To reduce bias and better establish causality, we excluded restaurants with less than 10 reviews and calculated the average customer rating from 2014 (the year after our survey was administered) and 2015. The results are shown in Table 5A.

**Table 5A**  
**OLS Regressions Predicting Organizational Outcomes**

| Variable                                  | Voluntary Turnover <sup>a</sup> |          |          |          |          | Involuntary Turnover <sup>b</sup> |          |          |          |          |
|-------------------------------------------|---------------------------------|----------|----------|----------|----------|-----------------------------------|----------|----------|----------|----------|
|                                           | Model 1                         | Model 2  | Model 3  | Model 4  | Model 5  | Model 6                           | Model 7  | Model 8  | Model 9  | Model 10 |
| <i>Company-owned</i>                      |                                 | 0.19+    | 0.21*    | -0.16    | -0.10    |                                   | 0.18     | 0.13     | 0.01     | 0.04     |
|                                           |                                 | (0.10)   | (0.11)   | (0.12)   | (0.12)   |                                   | (0.12)   | (0.12)   | (0.15)   | (0.16)   |
| <i>Franchisee-owned</i>                   |                                 | 0.34**   | 0.31**   |          |          |                                   | 0.16     | 0.08     |          |          |
|                                           |                                 | (0.12)   | (0.12)   |          |          |                                   | (0.15)   | (0.15)   |          |          |
| <i>Independently owned</i>                |                                 |          |          | -0.34**  | -0.31**  |                                   |          |          | -0.16    | -0.08    |
|                                           |                                 |          |          | (0.12)   | (0.12)   |                                   |          |          | (0.15)   | (0.15)   |
| <i>Skill-enhancing HR Practices</i>       |                                 |          | -0.04    |          | -0.04    |                                   |          | 0.13+    |          | 0.13+    |
|                                           |                                 |          | (0.06)   |          | (0.06)   |                                   |          | (0.07)   |          | (0.07)   |
| <i>Motivation-enhancing HR Practices</i>  |                                 |          | -0.24**  |          | -0.24**  |                                   |          | -0.31*** |          | -0.31*** |
|                                           |                                 |          | (0.09)   |          | (0.09)   |                                   |          | (0.09)   |          | (0.09)   |
| <i>Opportunity-enhancing HR Practices</i> |                                 |          | -0.09*   |          | -0.09*   |                                   |          | -0.10*   |          | -0.10*   |
|                                           |                                 |          | (0.04)   |          | (0.04)   |                                   |          | (0.04)   |          | (0.04)   |
| <i>Upscale fine dining</i>                | -0.35+                          | -0.26    | -0.25    | -0.26    | -0.25    | -0.13                             | -0.09    | -0.07    | -0.09    | -0.07    |
|                                           | (0.18)                          | (0.18)   | (0.18)   | (0.18)   | (0.18)   | (0.19)                            | (0.19)   | (0.19)   | (0.19)   | (0.19)   |
| <i>Casual fine dining</i>                 | -0.40*                          | -0.31+   | -0.31+   | -0.31+   | -0.31+   | -0.01                             | 0.03     | 0.06     | 0.03     | 0.06     |
|                                           | (0.16)                          | (0.16)   | (0.16)   | (0.16)   | (0.16)   | (0.18)                            | (0.18)   | (0.18)   | (0.18)   | (0.18)   |
| <i>Moderately priced family</i>           | -0.28+                          | -0.25+   | -0.27+   | -0.25+   | -0.27+   | 0.02                              | 0.04     | 0.04     | 0.04     | 0.04     |
|                                           | (0.15)                          | (0.15)   | (0.15)   | (0.15)   | (0.15)   | (0.16)                            | (0.16)   | (0.16)   | (0.16)   | (0.16)   |
| <i>Establishment size (log)</i>           | 0.09                            | 0.09     | 0.07     | 0.09     | 0.07     | 0.05                              | 0.05     | 0.01     | 0.05     | 0.01     |
|                                           | (0.06)                          | (0.06)   | (0.06)   | (0.06)   | (0.06)   | (0.07)                            | (0.07)   | (0.07)   | (0.07)   | (0.07)   |
| <i>Establishment age (log)</i>            | -0.22***                        | -0.22*** | -0.20*** | -0.22*** | -0.20*** | -0.27***                          | -0.27*** | -0.25*** | -0.27*** | -0.25*** |
|                                           | (0.04)                          | (0.04)   | (0.04)   | (0.04)   | (0.04)   | (0.05)                            | (0.05)   | (0.05)   | (0.05)   | (0.05)   |
| <i>Firm revenue (log)</i>                 | -0.03                           | -0.04    | -0.03    | -0.04    | -0.03    | 0.03                              | 0.02     | 0.03     | 0.02     | 0.03     |
|                                           | (0.04)                          | (0.05)   | (0.04)   | (0.05)   | (0.04)   | (0.05)                            | (0.05)   | (0.05)   | (0.05)   | (0.05)   |
| <i>QSR 50 brand</i>                       | 0.13                            | -0.05    | -0.08    | -0.05    | -0.08    | 0.22                              | 0.13     | 0.08     | 0.13     | 0.08     |
|                                           | (0.15)                          | (0.15)   | (0.15)   | (0.15)   | (0.15)   | (0.17)                            | (0.19)   | (0.18)   | (0.19)   | (0.18)   |
| <i>Percent of repeat customers</i>        | -0.41*                          | -0.35+   | -0.29    | -0.35+   | -0.29    | -0.42*                            | -0.38+   | -0.31    | -0.38+   | -0.31    |
|                                           | (0.20)                          | (0.20)   | (0.20)   | (0.20)   | (0.20)   | (0.21)                            | (0.21)   | (0.22)   | (0.21)   | (0.22)   |
| <i>Employee education level</i>           | -0.03                           | -0.02    | -0.01    | -0.02    | -0.01    | -0.03                             | -0.02    | -0.02    | -0.02    | -0.02    |
|                                           | (0.04)                          | (0.04)   | (0.04)   | (0.04)   | (0.04)   | (0.04)                            | (0.04)   | (0.04)   | (0.04)   | (0.04)   |
| State dummy variables                     | Yes                             | Yes      | Yes      | Yes      | Yes      | Yes                               | Yes      | Yes      | Yes      | Yes      |
| <i>R</i> <sup>2</sup>                     | 0.095                           | 0.102    | 0.117    | 0.102    | 0.117    | 0.065                             | 0.068    | 0.088    | 0.068    | 0.088    |

**Notes:** The values in parentheses are the standard errors. <sup>a</sup>N=1,050, <sup>b</sup>N=1,049; +p<.10, \*p<.05, \*\*p<.01, \*\*\*p<.001

**Table 5A (Continued)**

| Variable                                  | Total Turnover <sup>c</sup> |          |          |          |          | Customer Satisfaction <sup>d</sup> |          |          |          |          |
|-------------------------------------------|-----------------------------|----------|----------|----------|----------|------------------------------------|----------|----------|----------|----------|
|                                           | Model 11                    | Model 12 | Model 13 | Model 14 | Model 15 | Model 16                           | Model 17 | Model 18 | Model 19 | Model 20 |
| <i>Company-owned</i>                      |                             | 0.21*    | 0.20*    | -0.08    | -0.02    |                                    | -0.24*** | -0.25*** | 0.21+    | 0.19+    |
|                                           |                             | (0.10)   | (0.10)   | (0.12)   | (0.11)   |                                    | (0.06)   | (0.06)   | (0.11)   | (0.12)   |
| <i>Franchisee-owned</i>                   |                             | 0.29**   | 0.23*    |          |          |                                    | -0.45*** | -0.44*** |          |          |
|                                           |                             | (0.11)   | (0.11)   |          |          |                                    | (0.11)   | (0.11)   |          |          |
| <i>Independently owned</i>                |                             |          |          | -0.29**  | -0.23*   |                                    |          |          | 0.45***  | 0.44***  |
|                                           |                             |          |          | (0.11)   | (0.11)   |                                    |          |          | (0.11)   | (0.11)   |
| <i>Skill-enhancing HR Practices</i>       |                             |          | 0.04     |          | 0.04     |                                    |          | 0.005    |          | 0.005    |
|                                           |                             |          | (0.06)   |          | (0.06)   |                                    |          | (0.03)   |          | (0.03)   |
| <i>Motivation-enhancing HR Practices</i>  |                             |          | -0.32*** |          | -0.32*** |                                    |          | 0.12*    |          | 0.12*    |
|                                           |                             |          | (0.09)   |          | (0.09)   |                                    |          | (0.05)   |          | (0.05)   |
| <i>Opportunity-enhancing HR Practices</i> |                             |          | -0.10*   |          | -0.10*   |                                    |          | 0.01     |          | 0.01     |
|                                           |                             |          | (0.04)   |          | (0.04)   |                                    |          | (0.03)   |          | (0.03)   |
| <i>Upscale fine dining</i>                | -0.32+                      | -0.25    | -0.24    | -0.25    | -0.24    | 0.55***                            | 0.47***  | 0.47***  | 0.47***  | 0.47***  |
|                                           | (0.17)                      | (0.17)   | (0.17)   | (0.17)   | (0.17)   | (0.10)                             | (0.10)   | (0.10)   | (0.10)   | (0.10)   |
| <i>Casual fine dining</i>                 | -0.32*                      | -0.25    | -0.23    | -0.25    | -0.23    | 0.35***                            | 0.26**   | 0.26**   | 0.26**   | 0.26**   |
|                                           | (0.15)                      | (0.16)   | (0.15)   | (0.16)   | (0.15)   | (0.09)                             | (0.09)   | (0.09)   | (0.09)   | (0.09)   |
| <i>Moderately priced family</i>           | -0.21                       | -0.19    | -0.20    | -0.19    | -0.20    | 0.09                               | 0.08     | 0.09     | 0.08     | 0.09     |
|                                           | (0.14)                      | (0.14)   | (0.14)   | (0.14)   | (0.14)   | (0.10)                             | (0.10)   | (0.10)   | (0.10)   | (0.10)   |
| <i>Establishment size (log)</i>           | 0.03                        | 0.02     | -0.003   | 0.02     | -0.003   | -0.14***                           | -0.11**  | -0.11**  | -0.11**  | -0.11**  |
|                                           | (0.06)                      | (0.06)   | (0.06)   | (0.06)   | (0.06)   | (0.04)                             | (0.04)   | (0.04)   | (0.04)   | (0.04)   |
| <i>Establishment age (log)</i>            | -0.27***                    | -0.26*** | -0.24*** | -0.26*** | -0.24*** | -0.01                              | -0.03    | -0.04+   | -0.03    | -0.04+   |
|                                           | (0.04)                      | (0.04)   | (0.04)   | (0.04)   | (0.04)   | (0.02)                             | (0.02)   | (0.02)   | (0.02)   | (0.02)   |
| <i>Firm revenue (log)</i>                 | -0.03                       | -0.04    | -0.03    | -0.04    | -0.03    | 0.02                               | 0.03     | 0.03     | 0.03     | 0.03     |
|                                           | (0.04)                      | (0.04)   | (0.04)   | (0.04)   | (0.04)   | (0.03)                             | (0.03)   | (0.03)   | (0.03)   | (0.03)   |
| <i>QSR 50 brand</i>                       | 0.09                        | -0.07    | -0.11    | -0.07    | -0.11    | -0.21                              | 0.03     | 0.04     | 0.03     | 0.04     |
|                                           | (0.14)                      | (0.14)   | (0.14)   | (0.14)   | (0.14)   | (0.24)                             | (0.25)   | (0.25)   | (0.25)   | (0.25)   |
| <i>Percent of repeat customers</i>        | -0.34+                      | -0.29    | -0.22    | -0.29    | -0.22    | 0.46***                            | 0.39***  | 0.37**   | 0.39***  | 0.37**   |
|                                           | (0.20)                      | (0.20)   | (0.20)   | (0.20)   | (0.20)   | (0.12)                             | (0.11)   | (0.11)   | (0.11)   | (0.11)   |
| <i>Employee education level</i>           | -0.02                       | -0.02    | -0.01    | -0.02    | -0.01    | 0.06**                             | 0.05**   | 0.05**   | 0.05**   | 0.05**   |
|                                           | (0.04)                      | (0.04)   | (0.04)   | (0.04)   | (0.04)   | (0.02)                             | (0.02)   | (0.02)   | (0.02)   | (0.02)   |
| State dummy variables                     | Yes                         | Yes      | Yes      | Yes      | Yes      | Yes                                | Yes      | Yes      | Yes      | Yes      |
| <i>R</i> <sup>2</sup>                     | 0.092                       | 0.099    | 0.121    | 0.099    | 0.121    | 0.209                              | 0.260    | 0.270    | 0.260    | 0.270    |

**Notes:** The values in parentheses are the standard errors. <sup>c</sup>N=1,048, <sup>d</sup>N=689; +p<.10, \*p<.05, \*\*p<.01, \*\*\*p<.001

## REFERENCES

Batt R, Colvin AJ (2011) An employment systems approach to turnover: Human resources practices, quits, dismissals, and performance. *Acad. Management J.* 54(4): 695-717.

Lawrence B, Perrigot R (2015) Influence of organizational form and customer type on online customer satisfaction ratings. *J. Small Bus. Manag.* 53: 58-74.
